# Supplementary material for: Influence of the Substrate on the Exchange Coupling of NiO/FeCo Bilayers
Source: MDPI journal article supplement (doi:10.3390/cryst14040369), 2024-04-16
Supplement: s1 [file s1]

Article

# Influence of the Substrate on the Exchange Coupling of NiO/FeCo Bilayers

Iker Lorenzo-Feijoo <sup>1,2</sup>, Aida Serrano <sup>3</sup>, Cayetano Hernández-Gómez <sup>1</sup>, José Luis F. Cuñado <sup>4,5</sup> and Pilar Prieto <sup>1,5,\*</sup>

<sup>1</sup> Departamento de Física Aplicada, M-12 Universidad Autónoma de Madrid, 28049 Madrid, Spain; iker.lorenzo@estudiante.uam.es (I.L.-F.); cayetano.hernandez@estudiante.uam.es (C.H.-G.)

<sup>2</sup> Departamento de Física de Materiales, Universidad Complutense, 28040 Madrid, Spain

<sup>3</sup> Departamento de Electrocerámica, Instituto de Cerámica y Vidrio (ICV), Consejo Superior de Investigaciones Científicas, 28049 Madrid, Spain; aida.serrano@icv.csic.es

<sup>4</sup> IMDEA Nanociencia, Faraday 9, 28049 Madrid, Spain; joseluis.fcunnado@imdea.org

<sup>5</sup> Instituto Nicolás Cabrera (INC), Universidad Autónoma de Madrid, 28049 Madrid, Spain

\* Correspondence: pilar.prieto@uam.es

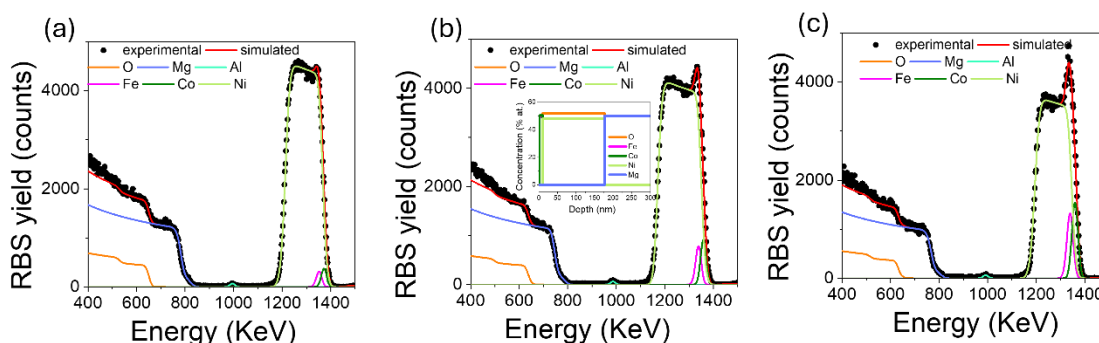

**Figure S1:** Random RBS spectra of NiO/FeCo bilayers with FeCo thickness of (a) 3 nm, (b) 8 nm and (c) 16 nm, obtained with  $^4\text{He}^+$  ions at 1.8 MeV grown on MgO (001) substrates, respectively. The simulation with SIMNRA program including the fitting signal for O, Ni, Fe, Co, Mg and Al from the capping are also included. In the inset of (b) it is included for the intermediate FeCo thickness, i.e., 8 nm, the atomic concentrations of the different elements as a function of depth (nm).

**Table S1:** Thickness and composition of NiO and FeCo layers determined by RBS and SIMNRA simulation. The samples are labelled with the thickness of the FeCo layer.:

| Sample  | NiO<br>RBS thickness (nm) | NiO<br>composition                | FeCo<br>RBS thickness (nm) | FeCo<br>composition                |
|---------|---------------------------|-----------------------------------|----------------------------|------------------------------------|
| S1_3nm  | 144.4                     | $\text{Ni}_{0.48}\text{O}_{0.52}$ | 2.8                        | $\text{Fe}_{0.49}\text{Co}_{0.51}$ |
| S2_8nm  | 165.2                     | $\text{Ni}_{0.48}\text{O}_{0.52}$ | 8.0                        | $\text{Fe}_{0.49}\text{Co}_{0.51}$ |
| S3_16nm | 143.1                     | $\text{Ni}_{0.48}\text{O}_{0.52}$ | 16.5                       | $\text{Fe}_{0.49}\text{Co}_{0.51}$ |

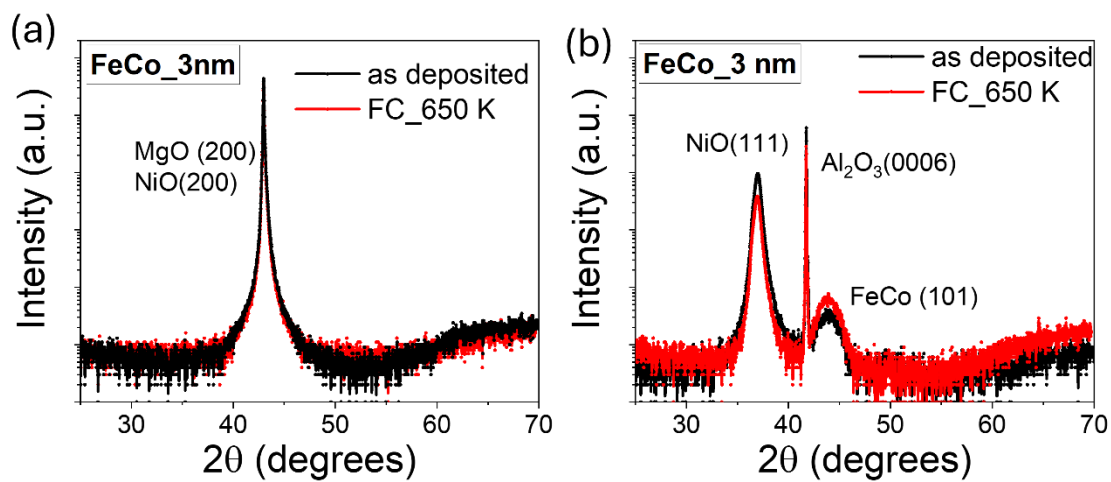

**Figure S2.** XRD diffraction pattern of NiO/FeCo bilayer with  $d_{\text{FeCo}} = 3$  nm on (a) MgO (001) and (b)  $\text{Al}_2\text{O}_3$  (0001) substrates before and after FC.

**Disclaimer/Publisher's Note:** The statements, opinions and data contained in all publications are solely those of the individual author(s) and contributor(s) and not of MDPI and/or the editor(s). MDPI and/or the editor(s) disclaim responsibility for any injury to people or property resulting from any ideas, methods, instructions or products referred to in the content.
